# Supplementary material for: Clinical workload in UK primary care: a retrospective analysis of 100 million consultations in England, 2007–14
Source: PubMed Central journal article supplement (PMC4899422; doi:10.1016/s0140-6736(16)00620-6), 2016-06-04
Supplement: mmc1.pdf [file mmc1.pdf]

# THE LANCET

## **Supplementary appendix**

This appendix formed part of the original submission and has been peer reviewed. We post it as supplied by the authors.

Supplement to: Hobbs FDR, Bankhead C, Mukhtar T, et al, on behalf of the National Institute for Health Research School for Primary Care Research. Clinical workload in UK primary care: a retrospective analysis of 100 million consultations in England, 2007–14. *Lancet* 2016; published online April 5. [http://dx.doi.org/10.1016/S0140-6736\(16\)00620-6](http://dx.doi.org/10.1016/S0140-6736(16)00620-6).

### Appendix 1: Denominator data: practices contributing data in each year

| Year                                                                | 2007/8 | 2008/9 | 2009/10 | 2010/11 | 2011/12 | 2012/13 | 2013/14 |
|---------------------------------------------------------------------|--------|--------|---------|---------|---------|---------|---------|
| Number of practices reporting at beginning of year                  | 362    | 364    | 362     | 357     | 342     | 326     | 308     |
| Number of practices that begin reporting during year                | 5      | 4      | 2       | 5       | 4       | 4       | 8       |
| Number of practices that stop reporting during year                 | 3      | 6      | 7       | 20      | 20      | 22      | 45      |
| Number of practices that start and stop reporting during year       | 0      | 0      | 0       | 1       | 0       | 0       | 2       |
| Number of practices that report for entire year                     | 359    | 358    | 355     | 338     | 322     | 304     | 265     |
| Number of practices that report at any time during year             | 367    | 368    | 364     | 362     | 346     | 330     | 316     |
|                                                                     |        |        |         |         |         |         |         |
|                                                                     |        |        |         |         |         |         |         |
| Mean number of patients in contributing practices in each year      | 9036.7 | 9120.6 | 9219.0  | 9313.4  | 9452.0  | 9604.8  | 9649.7  |
| Mean person-years follow-up for contributing practices in each year | 8358.2 | 8342.8 | 8463.0  | 8361.8  | 8490.9  | 8648.7  | 8201.1  |

**Appendix 2: Denominator data: person-years of observation, by age, sex, and year**

|       | 2007/8  |         | 2008/09 |         | 2009/10 |         | 2010/11 |         | 2011/12 |         | 2012/13 |         | 2013/14 |         |          |
|-------|---------|---------|---------|---------|---------|---------|---------|---------|---------|---------|---------|---------|---------|---------|----------|
|       | Male    | Female  | Male    | Female  | Male    | Female  | Male    | Female  | Male    | Female  | Male    | Female  | Male    | Female  | Total    |
| 0-4   | 83451   | 79445   | 85364   | 81209   | 86478   | 82417   | 86532   | 82440   | 85396   | 81544   | 83972   | 80259   | 75825   | 72504   | 1146837  |
| 5-14  | 181086  | 171986  | 180159  | 172143  | 179419  | 171474  | 175657  | 167725  | 170547  | 162783  | 166200  | 159034  | 151998  | 145679  | 2355889  |
| 15-24 | 181001  | 168902  | 182353  | 171722  | 183743  | 174945  | 180810  | 173518  | 174385  | 168534  | 169127  | 164415  | 153176  | 150872  | 2397504  |
| 25-44 | 444319  | 430931  | 439546  | 428252  | 436220  | 425855  | 422687  | 415212  | 403126  | 400720  | 390011  | 390787  | 350878  | 353884  | 5732428  |
| 45-64 | 407932  | 397593  | 411465  | 400914  | 413199  | 403364  | 408182  | 398910  | 391813  | 384869  | 377157  | 371578  | 340414  | 335821  | 5443210  |
| 65-74 | 125880  | 135352  | 128008  | 137498  | 131036  | 140224  | 129402  | 137897  | 128332  | 136909  | 129221  | 137989  | 119227  | 127613  | 1844589  |
| 75-84 | 76182   | 103786  | 76518   | 102402  | 77159   | 101501  | 75815   | 99275   | 73818   | 95715   | 72641   | 92476   | 66747   | 83635   | 1197671  |
| 85+   | 22572   | 50769   | 23362   | 51339   | 24068   | 51539   | 24350   | 50618   | 24243   | 49090   | 23821   | 47343   | 22094   | 42961   | 508169   |
| Total | 1522423 | 1538765 | 1526776 | 1545478 | 1531321 | 1551318 | 1503436 | 1525596 | 1451660 | 1480164 | 1412150 | 1443881 | 1280359 | 1312969 | 20626297 |

### Appendix 3 Practice characteristics of contributing practices.

| Variable                                                                         | Total number of practices | Median | IQR           | Number of practices | Proportion |
|----------------------------------------------------------------------------------|---------------------------|--------|---------------|---------------------|------------|
| <b>Practice population</b>                                                       |                           |        |               |                     |            |
| <b>Total FTE GPs (excluding GP registrars)</b>                                   | 386.00                    | 4.65   | 3.70 to 6.59  |                     |            |
| <b>All Staff FTE</b>                                                             | 346.00                    | 12.00  | 8.51 to 17.20 |                     |            |
| <b>Total Nurse FTE</b>                                                           | 346.00                    | 2.00   | 1.00 to 3.00  |                     |            |
| <b>Advance Nurse FTE</b>                                                         | 346.00                    | 0.50   | 0.50 to 1.00  |                     |            |
| <b>Extended Nurse FTE</b>                                                        | 346.00                    | 0.50   | 0.50 to 1.00  |                     |            |
| <b>Practice Nurse FTE</b>                                                        | 346.00                    | 1.00   | 1.00 to 2.00  |                     |            |
| <b>Direct Patient Care FTE</b>                                                   | 346.00                    | 0.80   | 0.40 to 1.75  |                     |            |
| <b>Proportion with at least one GP Registrar (including a training practice)</b> | 386.00                    |        |               | 154.00              | 0.40       |
| <b>Quintile of QOF achievement 2012/13</b>                                       | 385.00                    |        |               |                     |            |
| 1                                                                                |                           |        |               | 43.00               | 0.11       |
| 2                                                                                |                           |        |               | 62.00               | 0.16       |
| 3                                                                                |                           |        |               | 76.00               | 0.20       |
| 4                                                                                |                           |        |               | 92.00               | 0.24       |
| 5                                                                                |                           |        |               | 112.00              | 0.29       |
| <b>Quintile of QOF achievement 2013/14</b>                                       | 385.00                    |        |               |                     |            |
| 1                                                                                |                           |        |               | 58.00               | 0.15       |
| 2                                                                                |                           |        |               | 69.00               | 0.18       |
| 3                                                                                |                           |        |               | 65.00               | 0.17       |
| 4                                                                                |                           |        |               | 95.00               | 0.25       |
| 5                                                                                |                           |        |               | 98.00               | 0.25       |
|                                                                                  |                           |        |               |                     |            |

| Variable                                                                                    | Total number of practices | Median | IQR | Number of practices | Proportion |
|---------------------------------------------------------------------------------------------|---------------------------|--------|-----|---------------------|------------|
| <b>GP Patient Survey 2013/14 response rate quintile (GPPS)</b>                              | 386.00                    |        |     |                     |            |
| 1                                                                                           |                           |        |     | 34.00               | 0.09       |
| 2                                                                                           |                           |        |     | 63.00               | 0.16       |
| 3                                                                                           |                           |        |     | 90.00               | 0.23       |
| 4                                                                                           |                           |        |     | 125.00              | 0.32       |
| 5                                                                                           |                           |        |     | 74.00               | 0.19       |
|                                                                                             |                           |        |     |                     |            |
| <b>% White - English / Welsh / Scottish / Northern Irish / British quintile (from GPPS)</b> | 386.00                    |        |     |                     |            |
| 1                                                                                           |                           |        |     | 44.00               | 0.11       |
| 2                                                                                           |                           |        |     | 83.00               | 0.22       |
| 3                                                                                           |                           |        |     | 102.00              | 0.26       |
| 4                                                                                           |                           |        |     | 82.00               | 0.21       |
| 5                                                                                           |                           |        |     | 75.00               | 0.19       |
|                                                                                             |                           |        |     |                     |            |
| <b>Long-standing health condition % yes quintile (from GPPS)</b>                            | 386.00                    |        |     |                     |            |
| 1                                                                                           |                           |        |     | 79.00               | 0.20       |
| 2                                                                                           |                           |        |     | 80.00               | 0.21       |
| 3                                                                                           |                           |        |     | 79.00               | 0.20       |
| 4                                                                                           |                           |        |     | 90.00               | 0.23       |
| 5                                                                                           |                           |        |     | 58.00               | 0.15       |
|                                                                                             |                           |        |     |                     |            |

| Variable                                                           | Total number of practices | Median | IQR            | Number of practices | Proportion |
|--------------------------------------------------------------------|---------------------------|--------|----------------|---------------------|------------|
| <b>Practice rurality definition</b>                                | 390.00                    |        |                |                     |            |
| Hamlet and Isolated Dwelling - Less Sparse                         |                           |        |                | 1.00                | 0.003      |
| Town and Fringe - Less Sparse                                      |                           |        |                | 45.00               | 0.12       |
| Town and Fringe - Sparse                                           |                           |        |                | 7.00                | 0.02       |
| Urban >10k - Less Sparse                                           |                           |        |                | 325.00              | 0.83       |
| Village - Less Sparse                                              |                           |        |                | 11.00               | 0.03       |
| Village - Sparse                                                   |                           |        |                | 1.00                | 0.003      |
|                                                                    |                           |        |                |                     |            |
| <b>Region</b>                                                      | 398.00                    |        |                |                     |            |
| North East                                                         |                           |        |                | 9.00                | 0.02       |
| North West                                                         |                           |        |                | 65.00               | 0.16       |
| Yorkshire & The Humber                                             |                           |        |                | 17.00               | 0.04       |
| East Midlands                                                      |                           |        |                | 13.00               | 0.03       |
| West Midlands                                                      |                           |        |                | 41.00               | 0.10       |
| East of England                                                    |                           |        |                | 41.00               | 0.10       |
| South West                                                         |                           |        |                | 51.00               | 0.13       |
| South Central                                                      |                           |        |                | 41.00               | 0.10       |
| London                                                             |                           |        |                | 69.00               | 0.17       |
| South East Coast                                                   |                           |        |                | 51.00               | 0.13       |
|                                                                    |                           |        |                |                     |            |
| <b>Index of multiple deprivation (2010) from practice postcode</b> | 398.00                    | 16.34  | 10.37 to 25.20 |                     |            |
|                                                                    |                           |        |                |                     |            |

#### Appendix 4: Numbers of consultations (with a GP or nurse) by age, sex, and year\*

|       | 2007/08 |         | 2008/09 |         | 2009/10 |         | 2010/11 |         | 2011/12 |         | 2012/13 |         | 2013/14 |         |
|-------|---------|---------|---------|---------|---------|---------|---------|---------|---------|---------|---------|---------|---------|---------|
|       | Male    | Female  | Male    | Female  | Male    | Female  | Male    | Female  | Male    | Female  | Male    | Female  | Male    | Female  |
| 0-4   | 466742  | 418819  | 488336  | 438596  | 514867  | 466557  | 503150  | 452325  | 488308  | 439110  | 496011  | 448179  | 455414  | 413142  |
| 5-14  | 335365  | 344067  | 348241  | 364451  | 356938  | 371837  | 349192  | 366608  | 333280  | 352347  | 346989  | 365041  | 313057  | 331075  |
| 15-24 | 323823  | 709950  | 341047  | 755765  | 349256  | 816199  | 339992  | 784984  | 331031  | 751818  | 331853  | 747168  | 302314  | 686778  |
| 25-44 | 1028570 | 2176158 | 1036744 | 2238379 | 1066885 | 2284398 | 1035322 | 2247583 | 1006744 | 2195454 | 1002871 | 2170830 | 894009  | 1963786 |
| 45-64 | 1632525 | 2241305 | 1670784 | 2286128 | 1719566 | 2334388 | 1705142 | 2348460 | 1667450 | 2302589 | 1649791 | 2256497 | 1478071 | 2042727 |
| 65-74 | 928827  | 1087349 | 946723  | 1108345 | 990074  | 1140335 | 972409  | 1120316 | 974254  | 1119208 | 990900  | 1131018 | 920190  | 1050718 |
| 75-84 | 748426  | 1047515 | 766369  | 1048932 | 789143  | 1060425 | 778304  | 1048381 | 773172  | 1037938 | 779958  | 1024446 | 727431  | 944709  |
| 85+   | 252877  | 551718  | 275394  | 574577  | 290384  | 591762  | 298878  | 603024  | 309161  | 608247  | 313686  | 611300  | 294066  | 564285  |
| Total | 5717155 | 8576881 | 5873638 | 8815173 | 6077113 | 9065901 | 5982389 | 8971681 | 5883400 | 8806711 | 5912059 | 8754479 | 5384552 | 7997220 |
|       |         |         |         |         |         |         |         |         |         |         |         |         |         |         |

\* Crude numbers of consultations decline over time because there are fewer patients contributing data in the dataset

\*\* Shaded rows highlight the age groups contributing to the largest number of consultations.

Appendix 5: Crude and adjusted (to the 2013 mid-year English population) GP consultation rates/10,000 person-years by age, sex, and year

|                                            | 2007/08                                            |          | 2008/09                                           |          | 2009/10                                           |          | 2010/11                                           |          | 2011/12                                           |          | 2012/13                                           |          | 2013/14                                            |          |
|--------------------------------------------|----------------------------------------------------|----------|---------------------------------------------------|----------|---------------------------------------------------|----------|---------------------------------------------------|----------|---------------------------------------------------|----------|---------------------------------------------------|----------|----------------------------------------------------|----------|
|                                            | Male                                               | Female   | Male                                              | Female   | Male                                              | Female   | Male                                              | Female   | Male                                              | Female   | Male                                              | Female   | Male                                               | Female   |
| <b>0-4</b>                                 | 36875.22                                           | 34166.29 | 38010.14                                          | 35296.64 | 39103.38                                          | 36446.54 | 39144.91                                          | 36242.58 | 39247.54                                          | 36484.90 | 41164.77                                          | 38429.41 | 40860.07                                           | 38126.91 |
| <b>5-14</b>                                | 14077.08                                           | 15260.55 | 14538.72                                          | 15906.15 | 15134.33                                          | 16371.27 | 15340.04                                          | 16761.59 | 15219.67                                          | 16715.33 | 16390.20                                          | 17854.94 | 15915.96                                           | 17397.91 |
| <b>15-24</b>                               | 13695.80                                           | 31284.81 | 14220.21                                          | 32354.07 | 14592.21                                          | 33355.78 | 14568.71                                          | 33395.65 | 14780.14                                          | 33606.85 | 15468.10                                          | 34277.04 | 15466.32                                           | 34382.72 |
| <b>25-44</b>                               | 18160.27                                           | 37198.79 | 18603.00                                          | 38402.62 | 19373.78                                          | 39739.91 | 19497.21                                          | 40262.78 | 19924.47                                          | 40703.16 | 20669.45                                          | 41356.42 | 20612.02                                           | 41758.20 |
| <b>45-64</b>                               | 28972.25                                           | 41233.22 | 29493.41                                          | 42029.73 | 30215.73                                          | 42606.30 | 30497.64                                          | 43511.62 | 31120.45                                          | 44287.10 | 32265.23                                          | 45337.03 | 32414.84                                           | 45938.80 |
| <b>65-74</b>                               | 48272.04                                           | 55317.39 | 48419.83                                          | 55616.26 | 49246.66                                          | 56060.18 | 49327.37                                          | 56549.51 | 50212.61                                          | 57101.95 | 51276.41                                          | 57654.72 | 51963.98                                           | 58704.19 |
| <b>75-84</b>                               | 64179.06                                           | 69622.97 | 65522.87                                          | 71033.80 | 66583.93                                          | 72311.52 | 67649.35                                          | 73722.66 | 69111.90                                          | 75936.57 | 71425.23                                          | 78197.09 | 73364.39                                           | 80787.03 |
| <b>85+</b>                                 | 75499.04                                           | 78284.67 | 79314.60                                          | 80827.26 | 81590.13                                          | 82815.44 | 83972.72                                          | 87293.29 | 87460.67                                          | 91210.32 | 91483.87                                          | 95803.37 | 94730.43                                           | 99344.52 |
| <b>Total</b>                               | 26709.39                                           | 40119.75 | 27400.39                                          | 41105.37 | 28255.89                                          | 42044.64 | 28576.24                                          | 42740.16 | 29219.00                                          | 43426.83 | 30464.77                                          | 44525.80 | 30724.64                                           | 45093.98 |
| <b>Adjusted consultation rate/10,000/Y</b> | <b>33545.08*</b><br>(95% CI: 33524.47 to 33565.69) |          | <b>34337.40</b><br>(95% CI: 34316.62 to 34358.19) |          | <b>35177.52</b><br>(95% CI: 35156.55 to 35198.50) |          | <b>35630.58</b><br>(95% CI: 35609.30 to 35651.85) |          | <b>36211.83</b><br>(95% CI: 36190.07 to 36233.59) |          | <b>37322.90</b><br>(95% CI: 37300.54 to 37345.25) |          | <b>37689.85*</b><br>(95% CI: 37666.29 to 37713.40) |          |

\*An increase of 12.36%



Appendix 6: GP face-to-face surgery consultations, crude and adjusted (to 2013 mid-year English population) rates/10,000 person-years

|                                         | 2007/08                                     |          | 2008/09                                    |          | 2009/10                                    |          | 2010/11                                    |          | 2011/12                                    |          | 2012/13                                    |          | 2013/14                                     |          |
|-----------------------------------------|---------------------------------------------|----------|--------------------------------------------|----------|--------------------------------------------|----------|--------------------------------------------|----------|--------------------------------------------|----------|--------------------------------------------|----------|---------------------------------------------|----------|
|                                         | Male                                        | Female   | Male                                       | Female   | Male                                       | Female   | Male                                       | Female   | Male                                       | Female   | Male                                       | Female   | Male                                        | Female   |
| 0-4                                     | 34241.09                                    | 31681.19 | 35029.37                                   | 32513.46 | 35339.87                                   | 32837.57 | 35485.12                                   | 32813.80 | 35484.97                                   | 32950.01 | 36423.55                                   | 33910.39 | 35050.14                                    | 32656.31 |
| 5-14                                    | 13212.18                                    | 14305.77 | 13552.37                                   | 14827.28 | 13796.34                                   | 14903.06 | 14077.52                                   | 15405.39 | 13943.30                                   | 15304.56 | 14679.19                                   | 15985.85 | 13860.01                                    | 15119.27 |
| 15-24                                   | 12839.62                                    | 28984.66 | 13245.29                                   | 29743.33 | 13362.72                                   | 30184.79 | 13379.01                                   | 30250.97 | 13560.03                                   | 30375.93 | 13869.77                                   | 30229.73 | 13441.39                                    | 29269.39 |
| 25-44                                   | 16774.26                                    | 33804.60 | 17035.27                                   | 34568.92 | 17500.05                                   | 35197.77 | 17614.87                                   | 35680.76 | 17926.19                                   | 35918.40 | 18161.39                                   | 35685.37 | 17487.86                                    | 34896.75 |
| 45-64                                   | 26715.80                                    | 37531.29 | 26962.40                                   | 37906.50 | 27384.58                                   | 38023.86 | 27603.12                                   | 38812.51 | 28100.81                                   | 39379.33 | 28664.66                                   | 39606.92 | 28036.97                                    | 39248.06 |
| 65-74                                   | 43642.61                                    | 49244.86 | 43369.83                                   | 49077.77 | 43845.76                                   | 49145.08 | 43816.11                                   | 49469.46 | 44609.55                                   | 50021.33 | 44902.01                                   | 49725.41 | 44705.66                                    | 49696.82 |
| 75-84                                   | 54980.10                                    | 57254.47 | 55403.88                                   | 57784.95 | 56264.13                                   | 58535.95 | 57193.29                                   | 59732.60 | 58491.51                                   | 61984.37 | 59600.36                                   | 63061.74 | 60417.88                                    | 64273.17 |
| 85+                                     | 55990.19                                    | 53412.11 | 58535.81                                   | 54274.93 | 59811.60                                   | 55710.30 | 61890.84                                   | 59102.25 | 65276.55                                   | 62527.81 | 67687.78                                   | 65643.77 | 68989.08                                    | 67140.90 |
| Total                                   | 24218.87                                    | 35536.18 | 24618.97                                   | 36075.33 | 25116.93                                   | 36467.78 | 25400.65                                   | 37086.63 | 25925.33                                   | 37629.18 | 26542.74                                   | 37882.33 | 26079.11                                    | 37409.73 |
| Adjusted consultation rate/10,000P<br>Y | 30028.68*<br>(95% CI: 30009.17 to 30048.19) |          | 30459.86<br>(95% CI: 30440.27 to 30479.45) |          | 30850.35<br>(95% CI: 30830.69 to 30870.00) |          | 31255.92<br>(95% CI: 31235.98 to 31275.85) |          | 31718.72<br>(95% CI: 31698.34 to 31739.09) |          | 32097.03<br>(95% CI: 32076.29 to 32117.77) |          | 31589.53*<br>(95% CI: 31567.95 to 31611.11) |          |

\*An increase of 5.20%

Appendix 7: GP telephone consultations: crude and adjusted (to the 2013 mid-year English population) rates/10,000 person-years

|                                     | 2007/08                                  |         | 2008/09                                 |          | 2009/10                                 |          | 2010/11                                 |          | 2011/12                                 |          | 2012/13                                 |          | 2013/14                                  |          |
|-------------------------------------|------------------------------------------|---------|-----------------------------------------|----------|-----------------------------------------|----------|-----------------------------------------|----------|-----------------------------------------|----------|-----------------------------------------|----------|------------------------------------------|----------|
|                                     | Male                                     | Female  | Male                                    | Female   | Male                                    | Female   | Male                                    | Female   | Male                                    | Female   | Male                                    | Female   | Male                                     | Female   |
| 0-4                                 | 2523.40                                  | 2379.12 | 2875.81                                 | 2687.13  | 3663.14                                 | 3496.37  | 3587.45                                 | 3361.95  | 3704.84                                 | 3479.08  | 4684.30                                 | 4467.31  | 5764.43                                  | 5426.47  |
| 5-14                                | 828.83                                   | 923.10  | 944.94                                  | 1042.74  | 1296.97                                 | 1430.30  | 1231.32                                 | 1326.10  | 1253.03                                 | 1385.53  | 1680.15                                 | 1839.60  | 2037.07                                  | 2256.12  |
| 15-24                               | 812.59                                   | 2209.56 | 929.79                                  | 2526.24  | 1183.18                                 | 3080.10  | 1144.57                                 | 3068.04  | 1180.83                                 | 3162.21  | 1556.76                                 | 3982.42  | 1987.19                                  | 5060.64  |
| 25-44                               | 1314.35                                  | 3236.02 | 1495.91                                 | 3678.66  | 1801.25                                 | 4403.01  | 1808.60                                 | 4455.58  | 1929.62                                 | 4668.72  | 2443.42                                 | 5557.86  | 3059.41                                  | 6757.36  |
| 45-64                               | 1994.62                                  | 3327.50 | 2256.40                                 | 3740.16  | 2570.07                                 | 4227.80  | 2632.01                                 | 4350.41  | 2779.42                                 | 4572.75  | 3367.11                                 | 5409.40  | 4143.78                                  | 6383.67  |
| 65-74                               | 3458.78                                  | 4635.54 | 3897.18                                 | 5124.14  | 4326.91                                 | 5642.49  | 4443.43                                 | 5799.09  | 4577.52                                 | 5883.19  | 5376.20                                 | 6754.07  | 6306.77                                  | 7883.20  |
| 75-84                               | 5371.18                                  | 7059.31 | 6064.68                                 | 7887.24  | 6620.70                                 | 8643.19  | 6750.35                                 | 8928.35  | 7013.43                                 | 9095.48  | 8230.75                                 | 10353.65 | 9462.75                                  | 11862.83 |
| 85+                                 | 7733.10                                  | 9066.13 | 8770.12                                 | 10149.99 | 10067.00                                | 11255.96 | 10303.78                                | 11862.13 | 10460.75                                | 12407.86 | 12087.58                                | 13990.93 | 13946.55                                 | 15890.80 |
| Total                               | 1920.98                                  | 3417.57 | 2186.99                                 | 3843.29  | 2569.47                                 | 4448.65  | 2600.81                                 | 4525.35  | 2729.05                                 | 4700.88  | 3356.10                                 | 5568.08  | 4082.35                                  | 6627.38  |
| Adjusted consultation rate/10,000PY | 2668.80*<br>(95% CI: 2663.00 to 2674.60) |         | 3011.57<br>(95% CI: 3005.42 to 3017.71) |          | 3504.89<br>(95% CI: 3498.28 to 3511.51) |          | 3552.93<br>(95% CI: 3546.22 to 3559.64) |          | 3696.53<br>(95% CI: 3689.59 to 3703.47) |          | 4439.16<br>(95% CI: 4431.46 to 4446.87) |          | 5327.77*<br>(95% CI: 5318.92 to 5336.63) |          |

\* 99.63% increase from 2007/2008

## Appendix 8: Patient-level, univariate, zero truncated negative binomial regression analysis exploring consultation rates with IMD score in quintiles

|                        | IRR    | 95% CI           | % Change |
|------------------------|--------|------------------|----------|
| IMD Score in quintiles |        |                  |          |
| 1                      | 0.8852 | 0.8812 to 0.8892 | -11.5    |
| 2                      | 0.9851 | 0.9806 to 0.9896 | -1.5     |
| 4                      | 0.9908 | 0.9861 to 0.9955 | -0.9     |
| 5                      | 1.0355 | 1.0303 to 1.0407 | 3.5      |
|                        |        |                  |          |

The above table shows that:

1. Patients in quintile 1 would be expected to have a consultation rate that was 11.5% lower than those in quintile 3
2. Patients in quintile 2 would be expected to have a consultation rate 1.5% lower than those in quintile 3
3. Patients in quintile 4 would be expected to have a consultation rate 0.9% lower than those in quintile 3
4. Patients in quintile 5 would be expected to have a consultation rate 3.5% higher than those in quintile 3

## Appendix 9: Duration of face-to-face GP consultations (minutes)

|       | 2007/08                        |        | 2008/09                     |        | 2009/10                        |        | 2010/11                        |        | 2011/12                        |        | 2012/13                        |        | 2013/14                        |        | % change from<br>2007/08 –<br>2013/14 |        | Change in<br>seconds |        |
|-------|--------------------------------|--------|-----------------------------|--------|--------------------------------|--------|--------------------------------|--------|--------------------------------|--------|--------------------------------|--------|--------------------------------|--------|---------------------------------------|--------|----------------------|--------|
|       | Male                           | Female | Male                        | Female | Male                           | Female | Male                           | Female | Male                           | Female | Male                           | Female | Male                           | Female | Male                                  | Female | Male                 | Female |
| 0-4   | 7.91                           | 7.83   | 8.21                        | 8.09   | 8.35                           | 8.24   | 8.62                           | 8.49   | 8.67                           | 8.58   | 8.75                           | 8.65   | 8.86                           | 8.78   | 11.99%                                | 12.11% | 56.88                | 56.93  |
| 5-14  | 7.29                           | 7.45   | 7.55                        | 7.69   | 7.72                           | 7.87   | 7.94                           | 8.09   | 8.00                           | 8.13   | 7.95                           | 8.19   | 8.13                           | 8.32   | 11.61%                                | 11.75% | 50.78                | 52.53  |
| 15-24 | 7.96                           | 8.61   | 8.22                        | 8.85   | 8.36                           | 9.05   | 8.63                           | 9.31   | 8.72                           | 9.36   | 8.66                           | 9.33   | 8.77                           | 9.49   | 10.10%                                | 10.24% | 48.26                | 52.88  |
| 25-44 | 8.81                           | 9.09   | 9.09                        | 9.34   | 9.19                           | 9.48   | 9.40                           | 9.66   | 9.45                           | 9.66   | 9.34                           | 9.59   | 9.43                           | 9.68   | 6.99%                                 | 6.44%  | 36.97                | 35.15  |
| 45-64 | 9.04                           | 9.10   | 9.30                        | 9.33   | 9.39                           | 9.45   | 9.56                           | 9.62   | 9.53                           | 9.60   | 9.45                           | 9.54   | 9.48                           | 9.63   | 4.80%                                 | 5.86%  | 26.07                | 32.00  |
| 65-74 | 8.54                           | 8.62   | 8.87                        | 8.90   | 8.97                           | 9.03   | 9.15                           | 9.18   | 9.07                           | 9.11   | 9.01                           | 9.04   | 9.08                           | 9.17   | 6.26%                                 | 6.39%  | 32.10                | 33.03  |
| 75-84 | 8.44                           | 8.49   | 8.71                        | 8.77   | 8.76                           | 8.88   | 8.96                           | 9.05   | 8.89                           | 8.99   | 8.82                           | 8.90   | 8.91                           | 9.00   | 5.62%                                 | 6.00%  | 28.44                | 30.55  |
| 85+   | 7.93                           | 7.50   | 8.13                        | 7.77   | 8.28                           | 7.88   | 8.41                           | 7.97   | 8.32                           | 7.94   | 8.23                           | 7.82   | 8.39                           | 7.95   | 5.82%                                 | 6.08%  | 27.69                | 27.33  |
| Total | 8.65<br>95% CI (8.64,<br>8.65) |        | 8.90<br>95% CI (8.90, 8.91) |        | 9.03<br>95% CI (9.02,<br>9.03) |        | 9.21<br>95% CI (9.21,<br>9.22) |        | 9.20<br>95% CI (9.20,<br>9.20) |        | 9.13<br>95% CI (9.13,<br>9.14) |        | 9.22<br>95% CI (9.22,<br>9.23) |        | 6.68%                                 |        | 34.64 secs           |        |

**Appendix 10: Total number of days (2 x 3 hour surgery sessions) per 10,000 person years spent doing face-to-face, telephone, or visit consultations with a GP**

|       | 2007/08                        |        | 2008/09                        |        | 2009/10                        |        | 2010/11                        |        | 2011/12                        |        | 2012/13                        |        | 2013/14                        |        | % change from 2007/08 – 2013/14 |        | Change in days |        |
|-------|--------------------------------|--------|--------------------------------|--------|--------------------------------|--------|--------------------------------|--------|--------------------------------|--------|--------------------------------|--------|--------------------------------|--------|---------------------------------|--------|----------------|--------|
|       | Male                           | Female | Male                           | Female | Male                           | Female | Male                           | Female | Male                           | Female | Male                           | Female | Male                           | Female | Male                            | Female | Male           | Female |
| 0-4   | 784.5                          | 720.5  | 836.0                          | 766.1  | 869.1                          | 799.7  | 895.7                          | 817.2  | 901.8                          | 828.8  | 942.1                          | 869.4  | 932.0                          | 861.6  | 18.8%                           | 19.6%  | 147.5          | 141.1  |
| 5-14  | 278.2                          | 307.8  | 297.0                          | 330.4  | 314.1                          | 345.5  | 326.8                          | 363.7  | 326.0                          | 363.6  | 345.7                          | 386.6  | 338.5                          | 377.8  | 21.6%                           | 22.8%  | 60.2           | 70.0   |
| 15-24 | 295.2                          | 723.0  | 315.5                          | 765.8  | 327.0                          | 802.5  | 336.9                          | 825.4  | 345.1                          | 833.5  | 354.7                          | 837.7  | 353.8                          | 840.0  | 19.9%                           | 16.2%  | 58.7           | 117.0  |
| 25-44 | 430.3                          | 902.1  | 452.8                          | 952.0  | 473.9                          | 994.2  | 487.5                          | 1025.6 | 500.0                          | 1035.2 | 507.8                          | 1033.4 | 503.0                          | 1038.5 | 16.9%                           | 15.1%  | 72.7           | 136.3  |
| 45-64 | 706.0                          | 1004.6 | 735.8                          | 1045.5 | 758.9                          | 1069.7 | 778.8                          | 1110.6 | 793.1                          | 1127.7 | 809.5                          | 1139.4 | 807.1                          | 1154.8 | 14.3%                           | 15.0%  | 101.1          | 150.2  |
| 65-74 | 1109.9                         | 1274.5 | 1150.5                         | 1318.0 | 1182.6                         | 1346.3 | 1206.5                         | 1378.3 | 1220.5                         | 1384.0 | 1231.3                         | 1380.2 | 1248.4                         | 1416.3 | 12.5%                           | 11.1%  | 138.5          | 141.8  |
| 75-84 | 1442.7                         | 1552.8 | 1513.3                         | 1629.9 | 1547.7                         | 1680.0 | 1608.9                         | 1747.6 | 1638.0                         | 1797.3 | 1674.2                         | 1830.2 | 1731.3                         | 1907.1 | 20.0%                           | 22.8%  | 288.5          | 354.3  |
| 85+   | 1556.4                         | 1514.4 | 1676.9                         | 1612.5 | 1754.2                         | 1681.8 | 1837.7                         | 1799.9 | 1917.3                         | 1893.8 | 1997.8                         | 1979.0 | 2104.9                         | 2087.6 | 35.2%                           | 37.8%  | 548.5          | 573.2  |
| Total | 772.3<br>95% CI (771.0, 773.7) |        | 812.0<br>95% CI (810.6, 813.4) |        | 841.8<br>95% CI (840.4, 843.2) |        | 870.8<br>95% CI (869.4, 872.3) |        | 886.7<br>95% CI (885.2, 888.3) |        | 902.6<br>95% CI (901.0, 904.2) |        | 913.1<br>95% CI (911.4, 914.8) |        | 18.2%                           |        | 140.8          |        |
